# Supplementary material for: Characterization of the gel phases formed in the synthesis of microporous gallophosphate, cloverite
Source: Royal Society of Chemistry journal article supplement (doi:10.1039/c0jm02670k), 2010-01-01
Supplement: c0jm02670k.pdf [file c0jm02670k.pdf]

# Supporting Information

## **Characterization of the gel phases formed in the synthesis of microporous gallophosphate, cloverite**

Zhimin Yan, Chris W. Kirby, Yining Huang\*

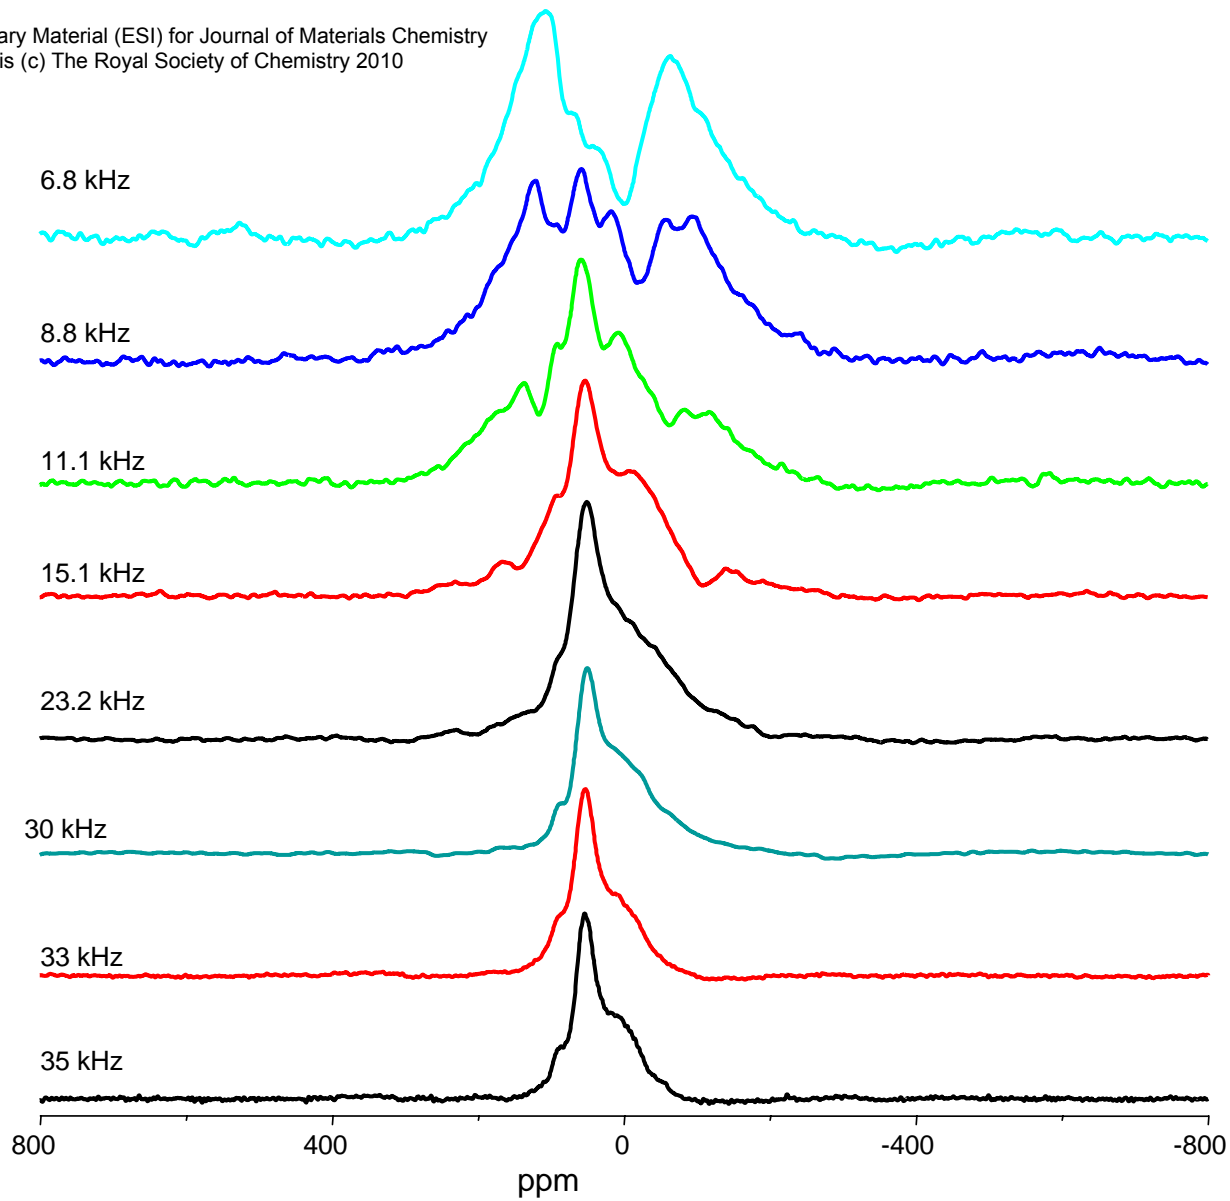

Figure S1  $^{71}\text{Ga}$  MAS NMR spectra of cloverite at 21.1 T with different spinning rates.  
\* denotes spinning sidebands.

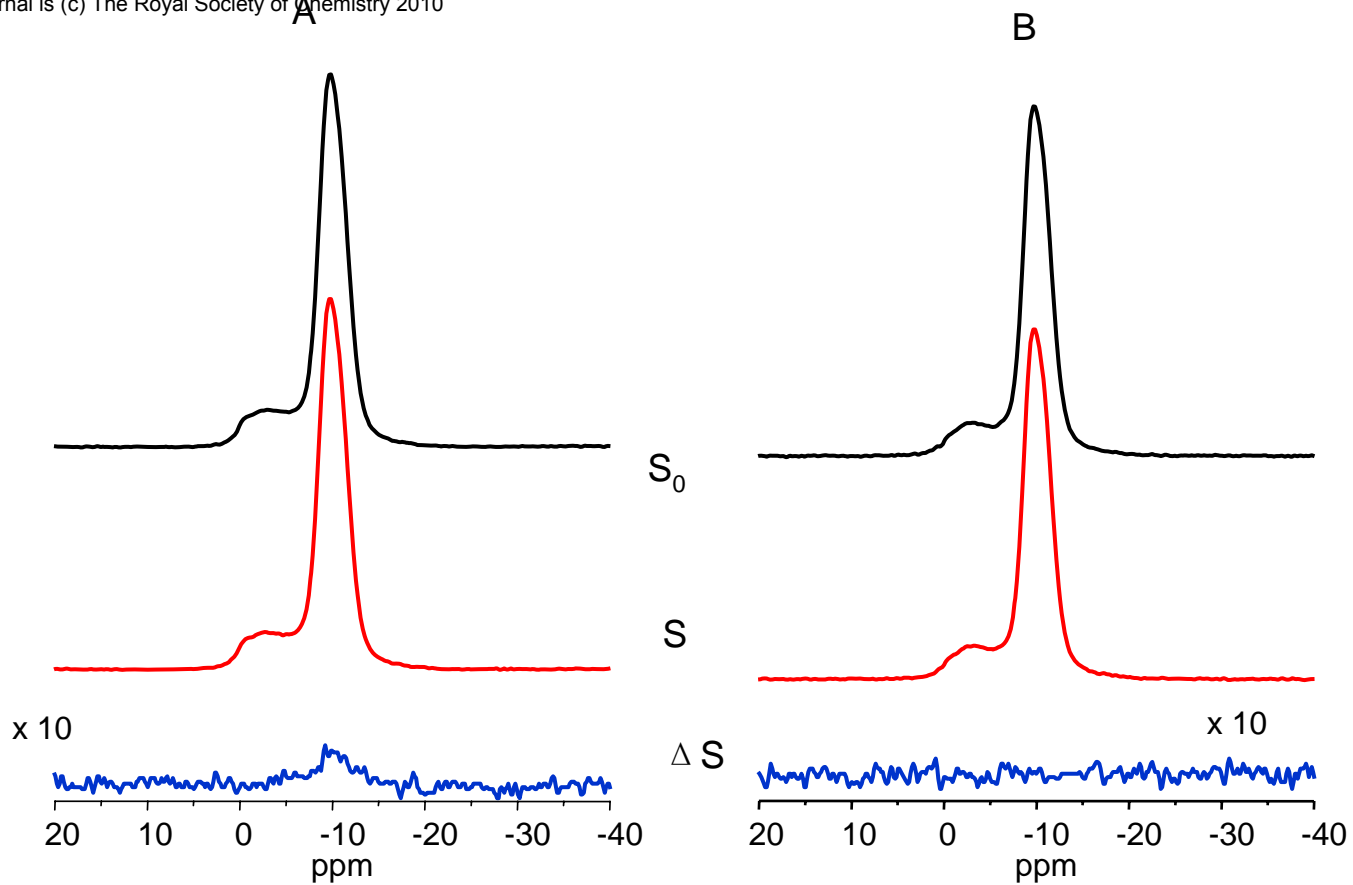

Figure S2 (A)  $^{31}\text{P}\{^{71}\text{Ga}\}$  REAPDOR spectra of cloverite with a dephasing time of 0.2 ms; (B) corresponding null experiment

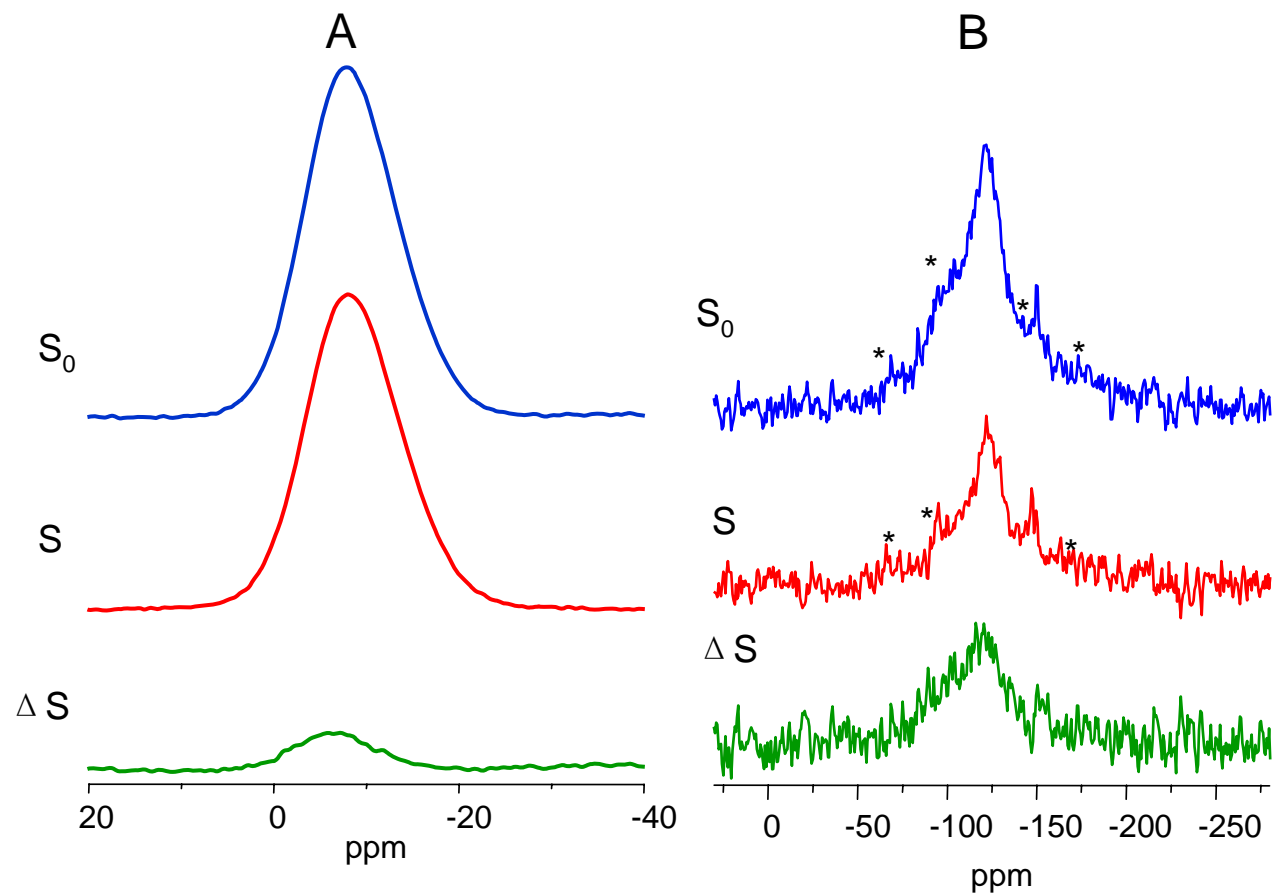

Figure S3  $^{31}\text{P}\{^{19}\text{F}\}$  REDOR (A) and  $^{19}\text{F}\{^{31}\text{P}\}$  REDOR (B) spectra of the initial gel with a dephasing time of 0.4 ms. \* denotes spinning sidebands.

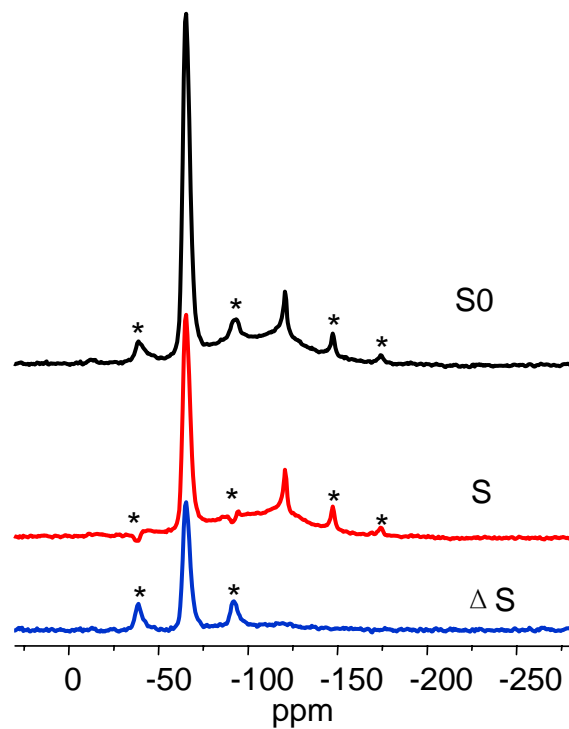

Figure S4  $^{19}\text{F}\{^{31}\text{P}\}$  REDOR spectra of the gel (18 h sample) with a dephasing time of 0.2 ms. \* denotes spinning sidebands.

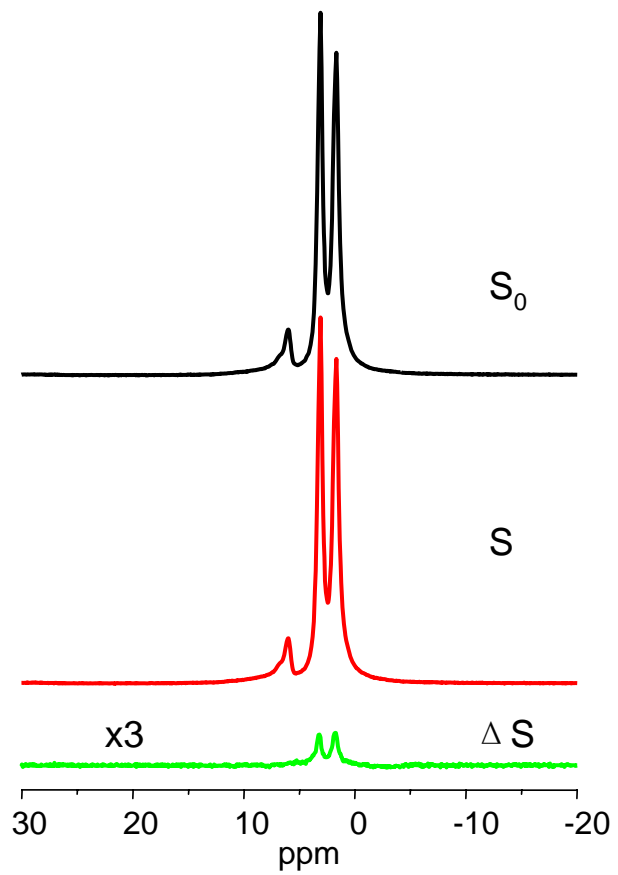

Figure S5  $^1\text{H}\{^{71}\text{Ga}\}$  TRAPDOR spectra of cloverite with a dephasing time of 0.133 ms

Table S1. Spectrometer parameters for REDOR, REAPDOR and TRAPDOR experiments

| I{S} spin pair                                  | 90° pulse on<br>I spin<br>( $\mu$ s) | 180° pulse on<br>I spin<br>( $\mu$ s) | 180° pulse on<br>S spin<br>( $\mu$ s) | Irradiation<br>field on S<br>(kHz) | Recycle delay<br>(s) | <sup>1</sup> H decoupling<br>field<br>(kHz) | Spinning<br>speed<br>(Hz) |
|-------------------------------------------------|--------------------------------------|---------------------------------------|---------------------------------------|------------------------------------|----------------------|---------------------------------------------|---------------------------|
| <sup>31</sup> P{ <sup>19</sup> F} <sup>a</sup>  | 5.0                                  | 10.0                                  | 11.2                                  |                                    | 180                  | 50                                          | 10000 $\pm$ 2             |
| <sup>19</sup> F{ <sup>31</sup> P} <sup>a</sup>  | 5.6                                  | 11.2                                  | 10                                    |                                    | 30                   | 50                                          | 10000 $\pm$ 2             |
| <sup>1</sup> H{ <sup>31</sup> P} <sup>a</sup>   | 4                                    | 8                                     | 8                                     |                                    | 10                   | 50                                          | 15000 $\pm$ 2             |
| <sup>31</sup> P{ <sup>71</sup> Ga} <sup>b</sup> | 5                                    | 10                                    |                                       | 100 kHz for<br>$\tau_R/3$          | 100                  | 50                                          | 10000 $\pm$ 2             |
| <sup>19</sup> F{ <sup>71</sup> Ga} <sup>b</sup> | 5                                    | 10                                    |                                       | 50 kHz for<br>$\tau_R/2$           | 20                   | 50                                          | 12000 $\pm$ 2             |
| <sup>1</sup> H{ <sup>71</sup> Ga} <sup>c</sup>  | 4                                    | 8                                     |                                       | 50                                 | 10                   | 50                                          | 15000 $\pm$ 2             |

<sup>a</sup>REDOR; <sup>b</sup>REAPDOR, <sup>c</sup>TRAPDOR
